# Supplementary material for: Sustained Akt signaling in articular chondrocytes causes osteoarthritis via oxidative stress-induced senescence in mice
Source: PubMed Central journal article supplement (PMC6804644; doi:10.1038/s41413-019-0062-y), 2019-08-05
Supplement: 41413_2019_62_MOESM1_ESM.pdf [file 41413_2019_62_MOESM1_ESM.pdf]

**Table S1.** Summarized information on human cartilage specimens.

OA cartilage samples from knee arthroplasties

| ID NO. | Gender | Age (year) | Disease duration* (year) | HSS scores | Medications |
|--------|--------|------------|--------------------------|------------|-------------|
| 1      | F      | 65         | 15                       | 43 (L)     | NSAIDs; HA  |
| 2      | M      | 59         | 6                        | 59 (R)     | NSAIDs      |
| 3      | F      | 66         | 10                       | 57 (L)     | NSAIDs; HA  |
| 4      | F      | 66         | 3                        | 30 (L)     | NSAIDs      |
| 5      | F      | 69         | 2                        | 41 (R)     | NSAIDs      |
| 6      | F      | 70         | 22                       | 53 (R)     | NSAIDs      |

Cartilage samples from traumatic knee joints

| ID NO. | Gender | Age (year) | Causes of trauma | OA history |
|--------|--------|------------|------------------|------------|
| 1      | F      | 50         | running sprain   | No         |
| 2      | F      | 54         | staircase fall   | No         |
| 3      | M      | 50         | car accident     | No         |

\*Since diagnosis; F: female, M: male; L: left, R: right; NSAIDs: nonsteroidal anti-inflammatory drugs, HA: hyaluronic acid.

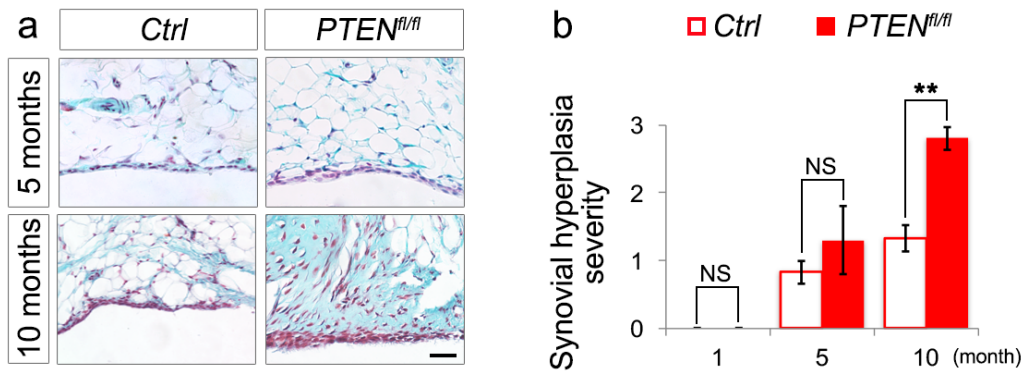

**Fig. S1.** Synovial hyperplasia occurs in *PTEN*-deficient mice. **a** Representative images of safranin O staining of synovia from *Ctrl* and *PTEN<sup>fl/fl</sup>* mice at 5 and 10 months (n = 6 per group). **b** Quantified synovial changes from *Ctrl* and *PTEN<sup>fl/fl</sup>* mice at 1, 5 and 10 months. Each value represents Mean  $\pm$  SEM (n = 6 per group). NS: not significant; \*\* $p$  < 0.01. Scale bar: 50  $\mu$ m.

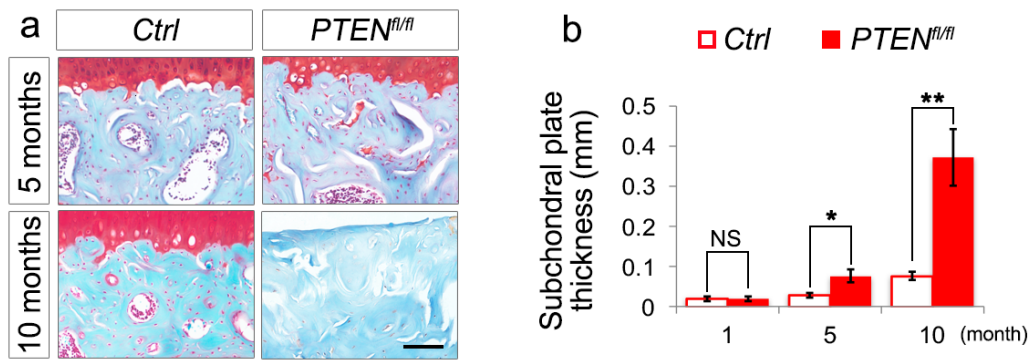

**Fig. S2.** Subchondral bone changes in *PTEN*-deficient mice. **a** Representative images of safranin O staining of subchondral bones from *Ctrl* and *PTEN<sup>fl/fl</sup>* mice at 5 and 10 months (n = 6 per group). **b** Quantified subchondral plate thickening in *Ctrl* and *PTEN<sup>fl/fl</sup>* mice at 1, 5 and 10 months. Each value represents Mean  $\pm$  SEM (n = 6 per group). NS, not significant; \* $p < 0.05$ ; \*\* $p < 0.01$ . Scale bar: 100  $\mu$ m.

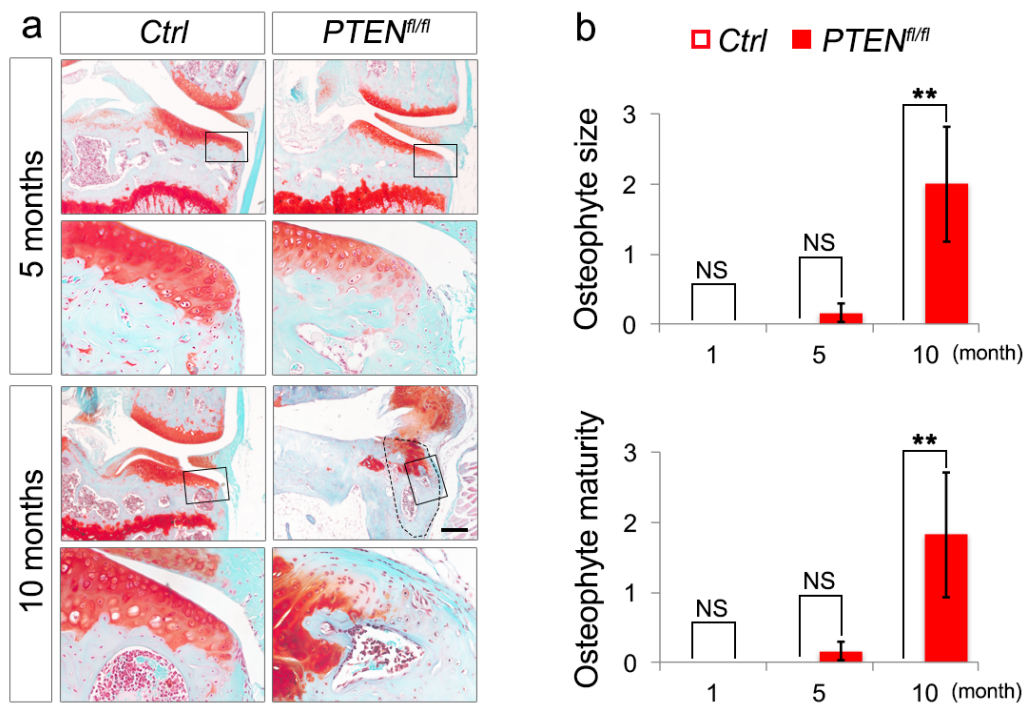

**Fig. S3.** Osteophytosis occurs in *PTEN*-deficient mice. **a** Representative images of safranin O staining of coronal sections from *Ctrl* and *PTEN<sup>fl/fl</sup>* mice at 5 and 10 months (n = 6 per group). The framed area in each picture is shown below at a higher magnification. **b** The scoring results of osteophyte size and osteophyte maturity in *Ctrl* and *PTEN<sup>fl/fl</sup>* mice at 1, 5 and 10 months. Each value represents Mean ± SEM (n = 6 per group). NS, not significant; \*\**p* < 0.01. Scale bar: 250 μm.

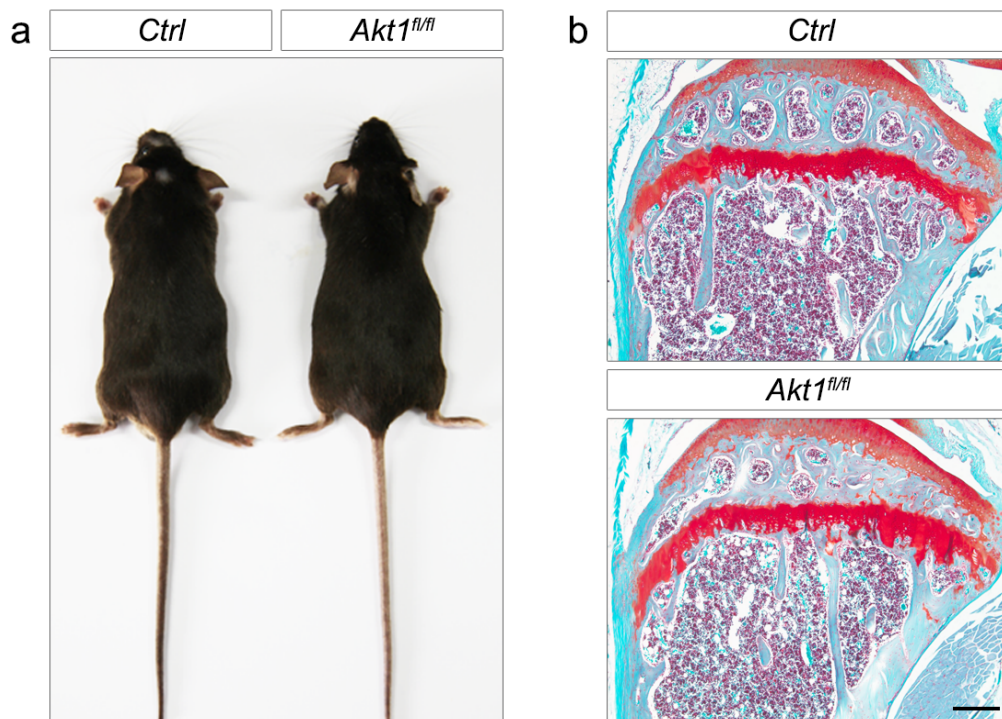

**Fig. S4.** *Akt1*-deficiency in chondrocytes does not cause visible defects in skeleton development. **a** Gross appearance of 6-month-old *Ctrl* and *Akt1<sup>fl/fl</sup>* mice. **b** Representative images of safranin O staining of tibial growth plates from 6-month-old *Ctrl* and *Akt1<sup>fl/fl</sup>* mice (n = 6 per group). Scale bar: 250  $\mu$ m.

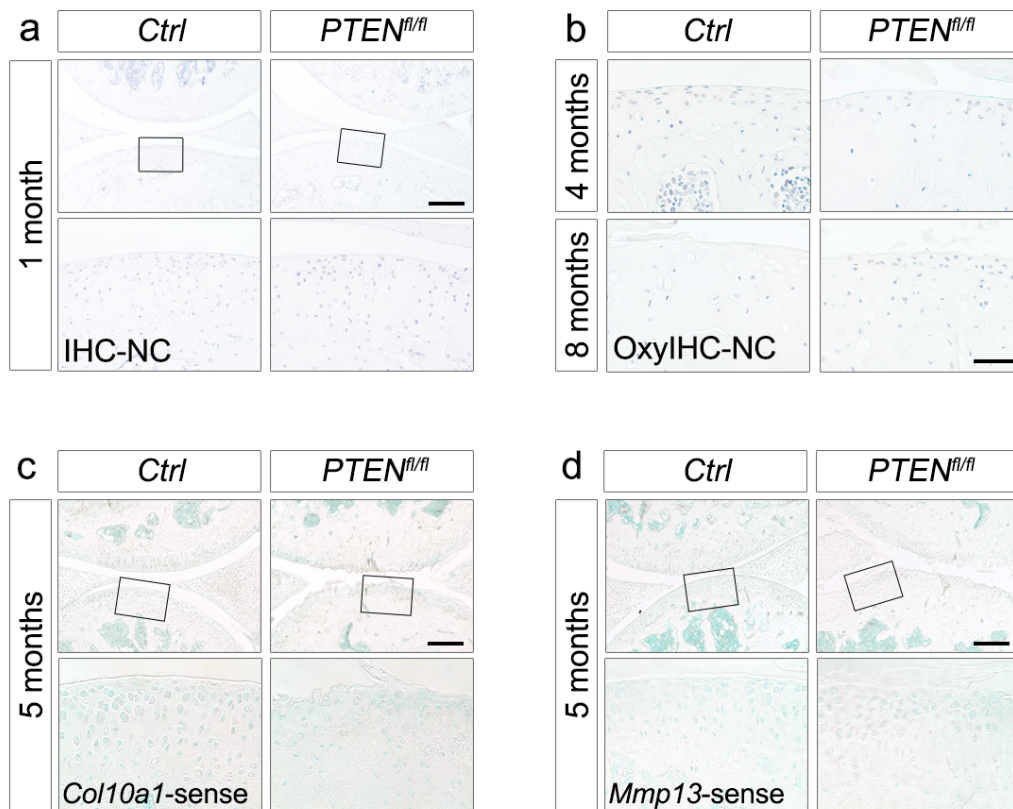

**Fig. S5.** Negative controls for chromogen-based histological staining methods. **a** Representative images of immunohistochemical staining performed on sections of 1-month-old mouse knee joints using non-immunized rabbit IgG as the negative control (NC). The framed area in each picture is shown below at a higher magnification. **b** Representative images of OxyIHC performed on sections of 4- and 8-month-old mouse knee joints. Negative control reactions were performed with the Derivatization Control Solution. **c, d** Representative images of *in situ* hybridization analyses of 5-month-old mouse knee joints using *Col10a1* and *Mmp13* sense probes, respectively. The framed area in each picture is shown below at a higher magnification. Scale bars: 50  $\mu$ m in **b**, 200  $\mu$ m in **a, c** and **d**.
